# Supplementary material for: Positive Association of Urinary Dimethylarsinic Acid (DMAV) with Serum 25(OH)D in Adults Living in an Area of Water-Borne Arsenicosis in Shanxi, China
Source: MDPI journal article supplement (doi:10.3390/toxics12010083), 2024-01-18
Supplement: s1 [file s1]

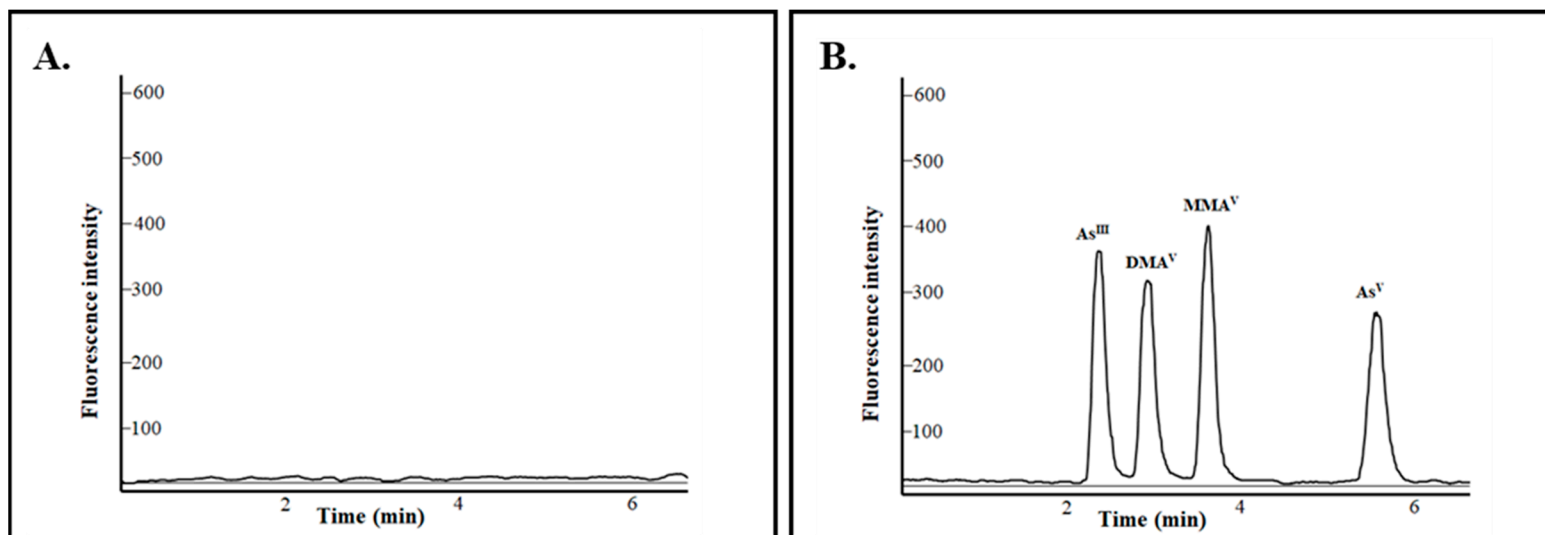

**Figure S1. Representative HPLC-AFS chromatograms.** (A) Representative HPLC-AFS chromatogram of blank. (B) Representative HPLC-AFS chromatogram of the standards, with concentrations recorded as As at 10 ng/mL ( $\text{As}^{\text{III}}$ ,  $\text{DMA}^{\text{V}}$ ,  $\text{MMA}^{\text{V}}$ , and  $\text{As}^{\text{V}}$  concentrations are all 10 ng/mL).

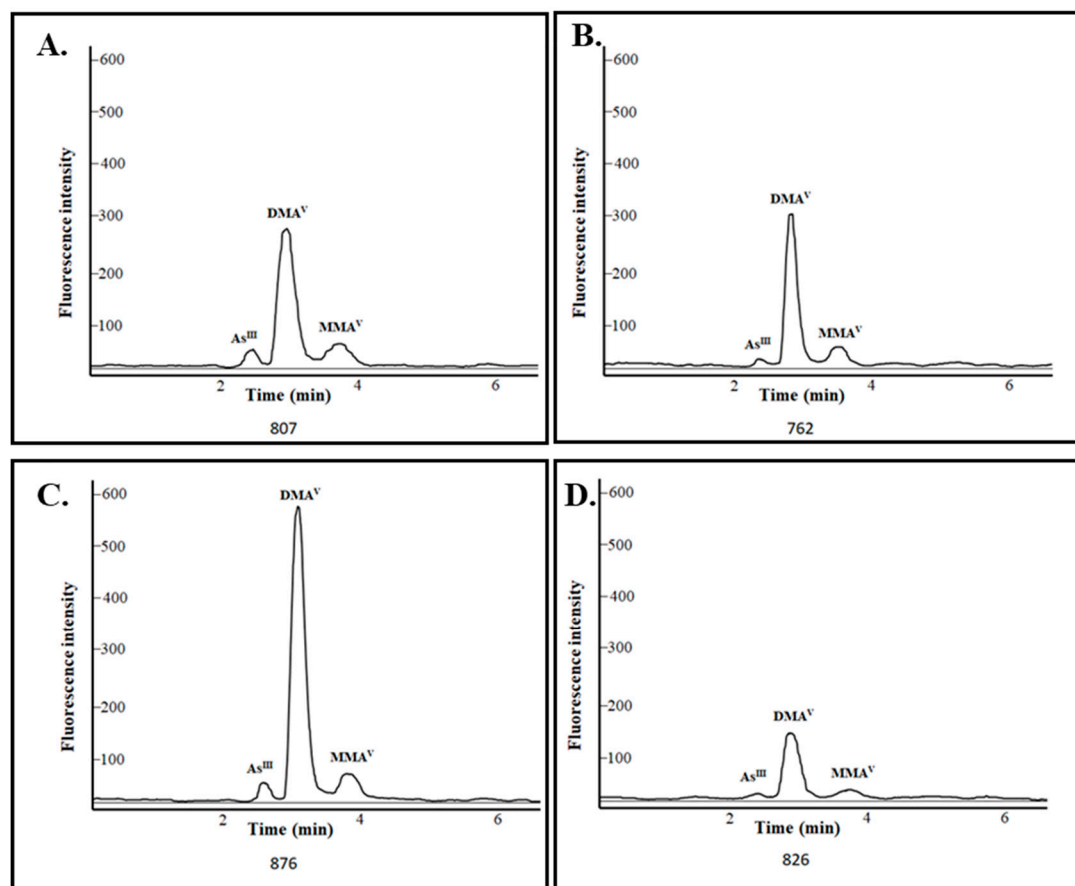

**Figure S2. Representative HPLC-AFS chromatograms.** (A) Representative HPLC-AFS chromatogram of urine sample #807. (B) Representative HPLC-AFS chromatogram of urine sample #762. (C) Representative HPLC-AFS chromatogram of urine sample #876. (D) Representative HPLC-AFS chromatogram of urine sample #826.

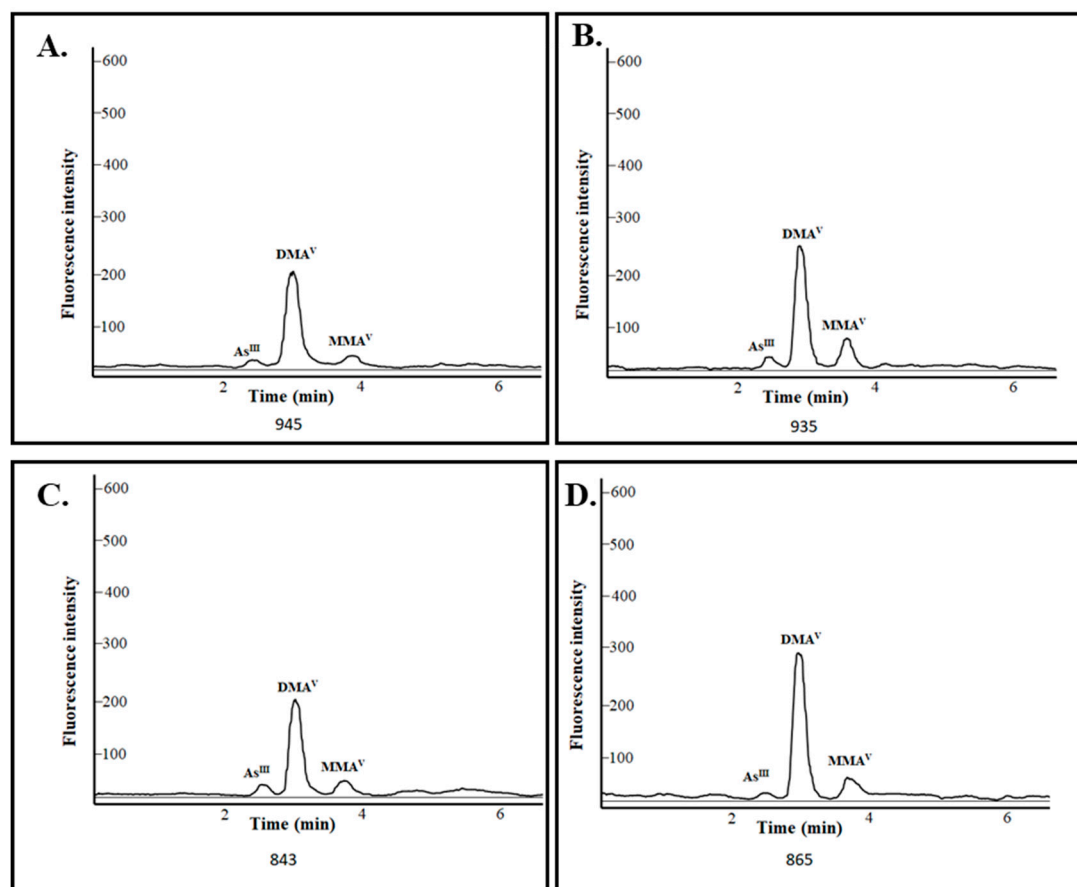

**Figure S3. Representative HPLC-AFS chromatograms.** (A) Representative HPLC-AFS chromatogram of urine sample #945. (B) Representative HPLC-AFS chromatogram of urine sample #935. (C) Representative HPLC-AFS chromatogram of urine sample #843. (D) Representative HPLC-AFS chromatogram of urine sample #865.

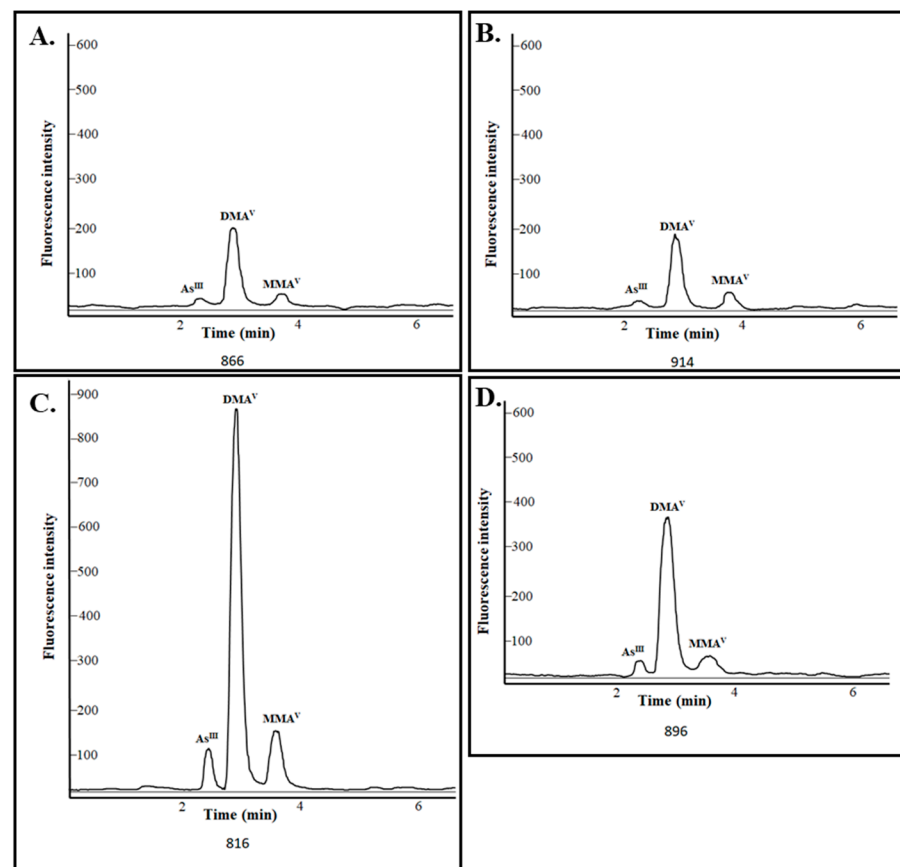

**Figure S4. Representative HPLC-AFS chromatograms.** (A) Representative HPLC-AFS chromatogram of urine sample #866. (B) Representative HPLC-AFS chromatogram of urine sample #914. (C) Representative HPLC-AFS chromatogram of urine sample #816. (D) Representative HPLC-AFS chromatogram of urine sample #896.

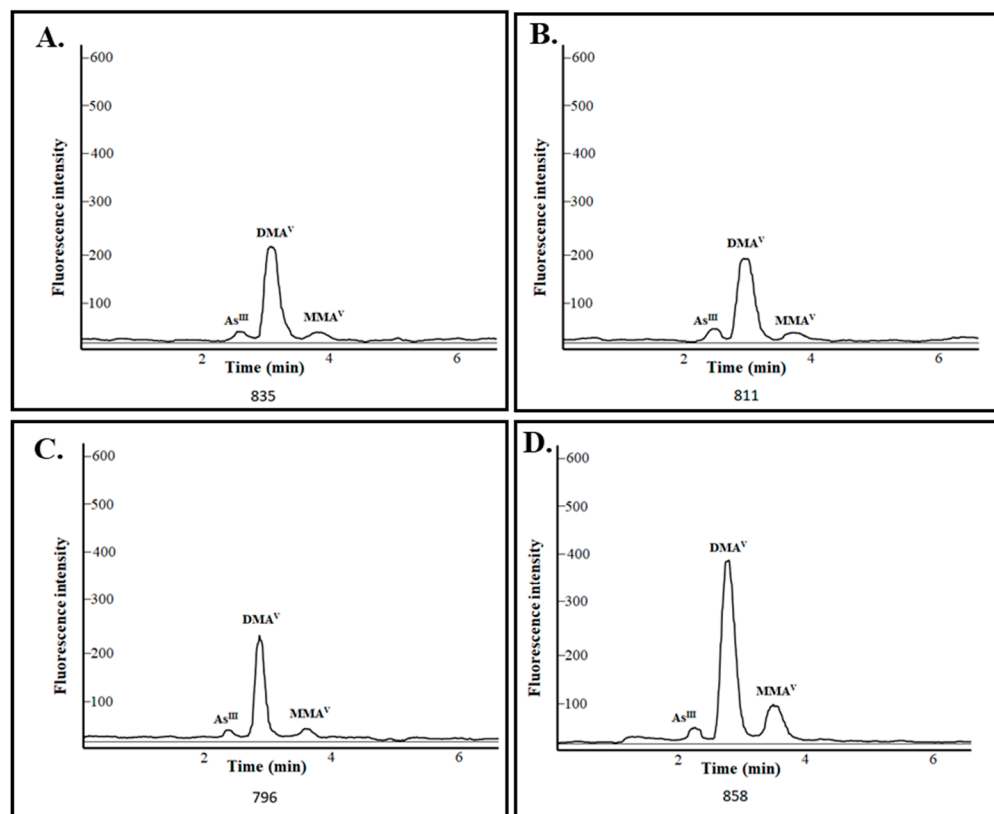

**Figure S5. Representative HPLC-AFS chromatograms.** (A) Representative HPLC-AFS chromatogram of urine sample #835. (B) Representative HPLC-AFS chromatogram of urine sample #811. (C) Representative HPLC-AFS chromatogram of urine sample #796. (D) Representative HPLC-AFS chromatogram of urine sample #858.

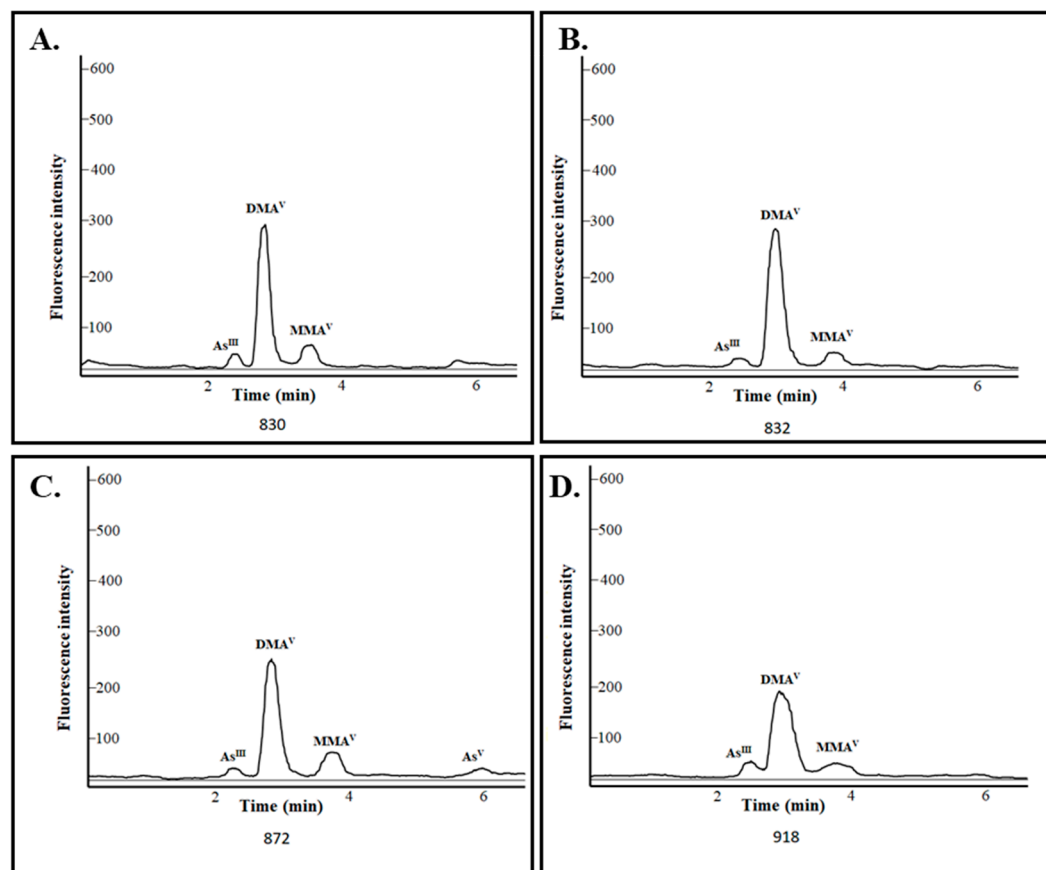

**Figure S6. Representative HPLC-AFS chromatograms.** (A) Representative HPLC-AFS chromatogram of urine sample #830. (B) Representative HPLC-AFS chromatogram of urine sample #832. (C) Representative HPLC-AFS chromatogram of urine sample #872. (D) Representative HPLC-AFS chromatogram of urine sample #918.

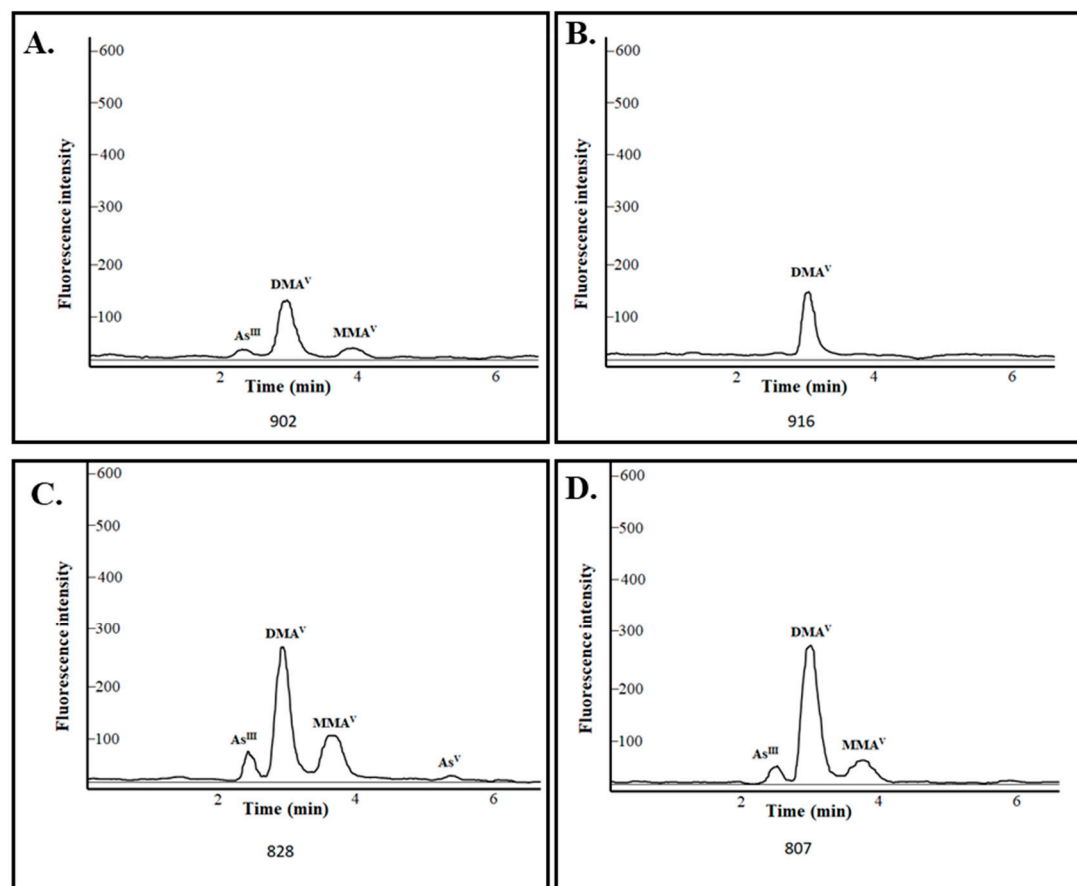

**Figure S7. Representative HPLC-AFS chromatograms.** (A) Representative HPLC-AFS chromatogram of urine sample #902. (B) Representative HPLC-AFS chromatogram of urine sample #916. (C) Representative HPLC-AFS chromatogram of urine sample #828. (D) Representative HPLC-AFS chromatogram of urine sample #807.

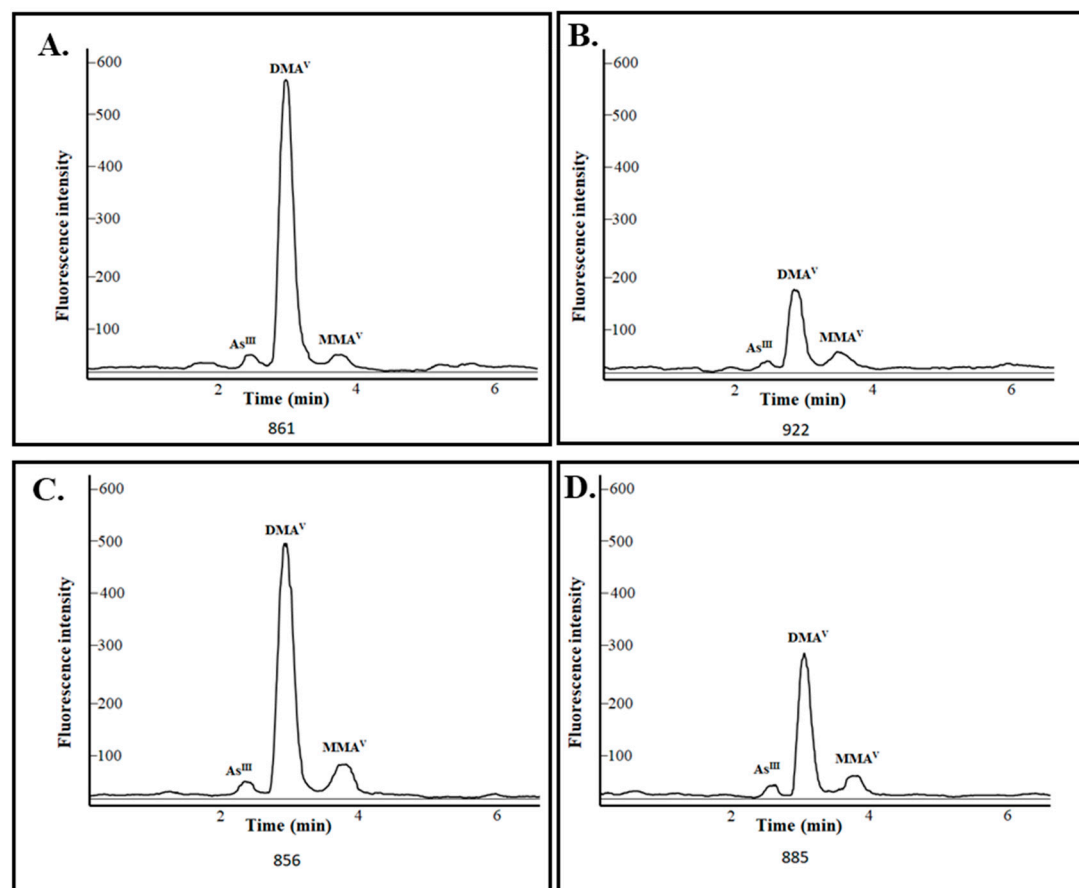

**Figure S8. Representative HPLC-AFS chromatograms.** (A) Representative HPLC-AFS chromatogram of urine sample #861. (B) Representative HPLC-AFS chromatogram of urine sample #922. (C) Representative HPLC-AFS chromatogram of urine sample #856. (D) Representative HPLC-AFS chromatogram of urine sample #885.



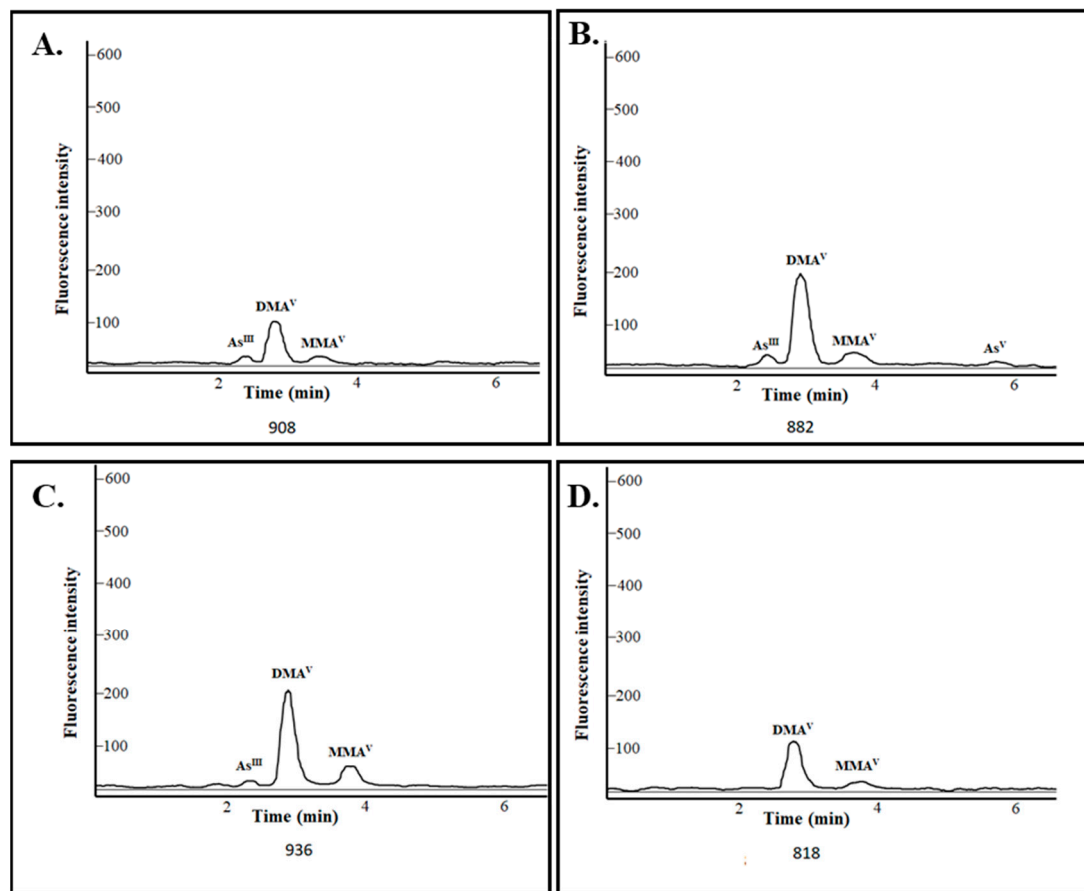

**Figure S9. Representative HPLC-AFS chromatograms.** (A) Representative HPLC-AFS chromatogram of urine sample #908. (B) Representative HPLC-AFS chromatogram of urine sample #882. (C) Representative HPLC-AFS chromatogram of urine sample #936. (D) Representative HPLC-AFS chromatogram of urine sample #818.

**Table S1 Population's characteristics description of the normal group and vitamin D excess group**

| Variables                                         | Normal group                     | Vitamin D excess group | t/χ <sup>2</sup> /z | P-Value       |
|---------------------------------------------------|----------------------------------|------------------------|---------------------|---------------|
|                                                   | Mean ± SD/median (P25-P75)/n (%) |                        |                     |               |
| Age, years, mean ± SD                             | 57.58 ± 10.80                    | 59.47 ± 10.79          | -1.709              | 0.088         |
| BMI, kg/m2, mean ± SD                             | 25.88 ± 3.70                     | 25.16 ± 5.48           | 1.763               | 0.078         |
| Gender, n (%)                                     |                                  |                        |                     |               |
| Male                                              | 175 (23.1)                       | 81 (10.7)              | 86.83               | < <b>0.01</b> |
| Female                                            | 469 (62.0)                       | 31 (4.2)               |                     |               |
| Skin hyperkeratosis                               |                                  |                        |                     |               |
| No                                                | 426 (56.3)                       | 63 (8.3)               | 4.093               | <b>0.043</b>  |
| Yes                                               | 218 (28.8)                       | 49 (6.6)               |                     |               |
| Education, n (%)                                  |                                  |                        |                     |               |
| Primary and below                                 | 221 (29.2)                       | 44 (5.8)               | 1.083               | 0.582         |
| Junior high school                                | 353 (46.7)                       | 56 (7.4)               |                     |               |
| Senior high and above                             | 70 (9.3)                         | 12 (1.6)               |                     |               |
| Occupation, n (%)                                 |                                  |                        |                     |               |
| Farmer                                            | 551 (72.8)                       | 101 (13.4)             | 1.716               | 0.190         |
| Others                                            | 93 (12.3)                        | 11 (1.5)               |                     |               |
| Milk consumption, n (%)                           |                                  |                        |                     |               |
| >1/week                                           | 256 (33.9)                       | 32 (4.2)               | 5.057               | <b>0.025</b>  |
| ≤1/week                                           | 388 (51.3)                       | 80 (10.6)              |                     |               |
| Urinary tAs, μg/L, median (P25-P75)               | 66.94 (24.98-132.63)             | 84.38 (37.59-152.59)   | -2.430              | <b>0.015</b>  |
| Urinary iAs, μg/L, median (P25-P75)               | 3.19 (0.83-14.35)                | 6.57 (0.83-17.47)      | -1.793              | 0.073         |
| Urinary MMA <sup>V</sup> , μg/L, median (P25-P75) | 4.33 (0.32-15.07)                | 6.84 (0.32-19.11)      | -1.490              | 0.136         |
| Urinary DMA <sup>V</sup> , μg/L, median (P25-P75) | 48.59 (17.96-100.88)             | 70.85 (32.13-122.89)   | -2.555              | <b>0.011</b>  |

|                                         |                   |                   |        |       |
|-----------------------------------------|-------------------|-------------------|--------|-------|
| Blood glucose, mmol/L, median (P25-P75) | 5.80 (5.10, 7.35) | 5.70 (5.10, 6.70) | -1.088 | 0.276 |
|-----------------------------------------|-------------------|-------------------|--------|-------|

---

**Table S2 Population's characteristics description of the normal group and skin hyperkeratosis group**

| Variables                                              | Normal group                         | Skin hyperkeratosis group | t/ $\chi^2$ /z | P-Value       |
|--------------------------------------------------------|--------------------------------------|---------------------------|----------------|---------------|
|                                                        | Mean $\pm$ SD/median (P25-P75)/n (%) |                           |                |               |
| Age, years, mean $\pm$ SD                              | 58.25 $\pm$ 11.08                    | 57.30 $\pm$ 10.26         | 1.150          | 0.250         |
| BMI, kg/m2, mean $\pm$ SD                              | 25.59 $\pm$ 4.19                     | 26.09 $\pm$ 3.63          | -1.620         | 0.106         |
| Gender, n (%)                                          |                                      |                           |                |               |
| Male                                                   | 166 (21.8)                           | 90 (11.8)                 | 0.002          | 0.962         |
| Female                                                 | 329 (43.2)                           | 177 (23.2)                |                |               |
| Education, n (%)                                       |                                      |                           |                |               |
| Primary and below                                      | 185 (24.3)                           | 84 (11.0)                 | 4.347          | 0.114         |
| Junior high school                                     | 252 (33.1)                           | 157 (20.6)                |                |               |
| Senior high and above                                  | 58 (7.6)                             | 26 (3.4)                  |                |               |
| Occupation, n (%)                                      |                                      |                           |                |               |
| Farmer                                                 | 423 (55.5)                           | 234 (30.7)                | 0.698          | 0.404         |
| Others                                                 | 72 (9.5)                             | 33 (4.3)                  |                |               |
| Milk consumption, n (%)                                |                                      |                           |                |               |
| >1/week                                                | 185 (24.3)                           | 106 (13.9)                | 0.398          | 0.528         |
| $\leq$ 1/week                                          | 310 (40.7)                           | 161 (21.1)                |                |               |
| Urinary tAs, $\mu$ g/L, median (P25-P75)               | 57.49 (19.92-122.79)                 | 80.04 (41.42-149.22)      | -3.917         | < <b>0.01</b> |
| Urinary iAs, $\mu$ g/L, median (P25-P75)               | 3.19 (0.83-14.47)                    | 5.28 (0.83-15.10)         | -0.836         | 0.403         |
| Urinary MMA <sup>V</sup> , $\mu$ g/L, median (P25-P75) | 3.58 (0.32-15.34)                    | 6.85 (0.32-17.30)         | -1.700         | 0.089         |
| Urinary DMA <sup>V</sup> , $\mu$ g/L, median (P25-P75) | 45.32 (14.08-95.58)                  | 66.70 (32.70-119.50)      | -4.044         | < <b>0.01</b> |
| Blood glucose, mmol/L, median (P25-P75)                | 5.80 (5.10, 6.70)                    | 5.60 (5.10, 6.60)         | -1.687         | 0.092         |
| 25(OH)D, ng/mL, mean $\pm$ SD                          | 72.79 $\pm$ 21.14                    | 76.34 $\pm$ 25.15         | -2.064         | <b>0.039</b>  |
